# Supplementary material for: NSMCE2, a Novel Super-Enhancer-Regulated Gene, is Linked to Poor Prognosis and Therapy Resistance in Breast Cancer
Source: Research Square preprint supplement (doi:10.21203/rs.3.rs-1548045/v1), 2022-04-18
Supplement: Supplementary file 2 [file 5f36d94031bff499013948e5.xlsx]

## Sheet: Hoja1
Association between RNA expression of SE-associated genes and response to chemotherapy in breast cancer patients.
Official symbol	pCR to Chemotherapy in BC patients (n=507)				pCR to Chemotherapy in Grade III BC patients (n=194)
	AUC	ROC p-value	Mann-Whitney test p-value	Higher expression in patient group	AUC	ROC p-value	Mann-Whitney test p-value	Higher expression in patient group
MIR4435-2HG	0.524	0.22	0.42	Responder	0.528	0.29	0.55	Responder
SNORA14B	NA	NA	NA	NA	NA	NA	NA	NA
ANKRD12	0.515	0.17	0.34	Responder	0.528	0.13	0.25	Responder
CYTOR	NA	NA	NA	NA	NA	NA	NA	NA
PKP1	0.567	5.6e-06	1.1e-05	Responder	0.501	49	0.98	Non-responder
NSMCE2	0.617	3.2e-05	0.00011	Non-responder	0.655	0.00017	0.00099	Non-responder
MACF1	0.561	3.9e-05	7e-05	Responder	0.513	0.29	0.58	No change
LINC02532	NA	NA	NA	NA	NA	NA	NA	NA
VXN	0.547	0.045	0.12	Responder	0.53	0.25	0.52	Responder
LINC00673	NA	NA	NA	NA	NA	NA	NA	NA
BCAS4	0.502	0.48	0.95	No change	0.506	0.44	0.89	Responder
PHLDA3	0.594	4.8e-11	6.5e-10	Non-responder	0.509	0.35	0.69	Responder
KLF6	0.529	0.18	0.33	Non-responder	0.568	0.072	0.15	Non-responder
CAPN2	0.548	0.00071	0.0016	Responder	0.532	0.093	0.19	Non-responder
TRPS1	0.513	0.21	0.4	Responder	0.573	0.00088	0.0024	Non-responder
CFLAR	0.559	0.03	0.05	Responder	0.501	0.49	0.98	Non-responder
EIF3H	0.511	0.24	0.49	No change	0.545	0.027	0.061	Non-responder
ATP9A	0.516	0.15	0.3	Non-responder	0.544	0.034	0.067	Non-responder
CUEDC1	0.523	0.23	0.44	Responder	0.536	0.25	0.45	Responder
MAL2	0.557	0.003	0.06	Non-responder	0.554	0.13	0.25	Non-responder
NDST1	0.533	0.013	0.029	Responder	0.553	0.015	0.028	Responder
DLGAP1-AS1	0.542	0.08	0.16	Responder	0.63	0.0017	0.0055	Responder
ATP2B4	0.503	0.41	0.82	No change	0.54	0.045	0.094	Non-responder
YWHAZ	0.609	3.5e-14	7.2e-13	Responder	0.539	0.055	0.11	Responder
AGO2	0.513	0.33	0.66	No change	0.57	0.052	0.13	Non-responder
SUMO1P1	NA	NA	NA	NA	NA	NA	NA	NA
Supplementary Table 3. Values for AUC, ROC p-value and Mann-Whitney test p-value are shown for each gene, along with the patient group with higher gene expression in breast cancer patients (n = 507) and in Grade III breast cancer patients (n = 194). The analysis was performed using ROC Plotter. pCR = pathological complete response, NA = non-available.
